# Supplementary material for: Appropriate Donor-Acceptor Phase Separation Structure for the Enhancement of Charge Generation and Transport in Polymer Solar Cells
Source: MDPI journal article supplement (doi:10.3390/polym10030332), 2018-03-18
Supplement: s1 [file s1]

## Appropriate Donor-Acceptor Phase Separation Structure for the Enhancement of Charge Generation and Transport in PTB7-based Polymer Solar Cells

Dayong Zhang<sup>1,2</sup>, Rong Hu<sup>2,\*</sup>, Jiang Cheng<sup>2</sup>, Yuqiang Chang<sup>3</sup>, Mingming Huo<sup>4</sup>, Junsheng Yu<sup>1</sup>, Lu Li<sup>2,\*</sup>, and Jian-Ping Zhang<sup>3</sup>

<sup>1</sup>State Key Laboratory of Electronic Thin Films and Integrated Devices, School of Optoelectronic Science and Engineering, University of Electronic Science and Technology of China (UESTC), Chengdu 610054, P. R. China

<sup>2</sup>Research Institute for New Materials Technology, Chongqing University of arts and sciences, Chongqing 402160, P. R. China

<sup>3</sup>Department of Chemistry, Renmin University of China, Beijing, 100872, P. R. China

<sup>4</sup>Qingdao Research Center for Advanced Photonic Technologies, Laser Research Institute, Shandong Academy of Sciences, Qingdao 266100, P. R. China

### S1. Steady-state absorption spectra of PC<sub>71</sub>BM solutions.

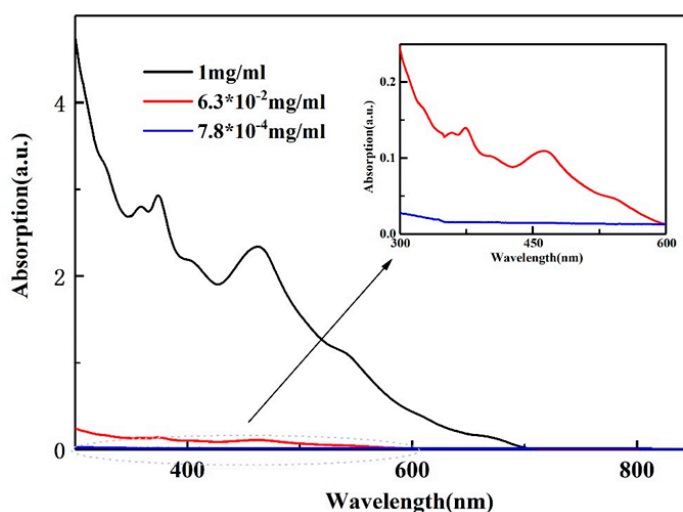

**Figure S1.** Steady-state absorption spectra of PC<sub>71</sub>BM solution at different concentrations.

### S2. Effects of DIO and PC<sub>71</sub>BM on aggregation state of PTB7 in solution

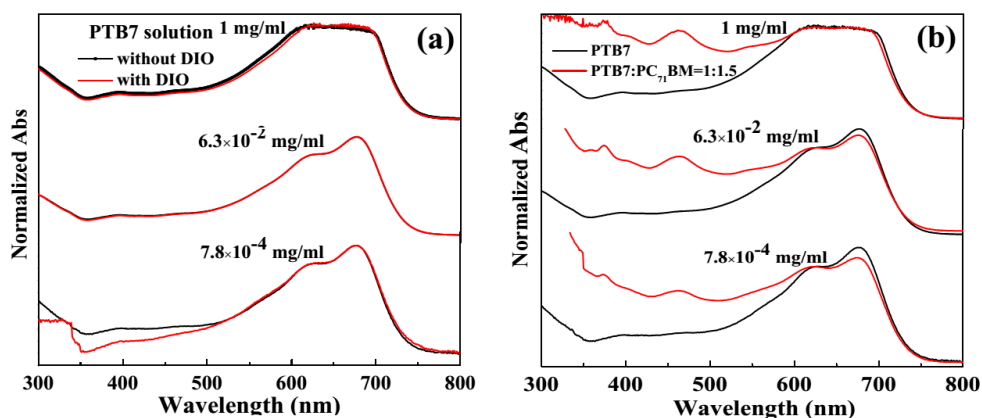

**Figure S2.** Steady-state absorption spectra of PTB7 solution and mixed PTB7:PC<sub>71</sub>BM solution at varied concentration conditions. (a) represents PTB7 dissolution in CB solvent or CB:DIO=97%:3% solvents. (b) represents PTB7 or PTB7:PC<sub>71</sub>BM=1:1.5 dissolution in CB solvent. All spectra were normalized at 623 nm.

### S3. Transient absorption spectra of PTB7-based active layers

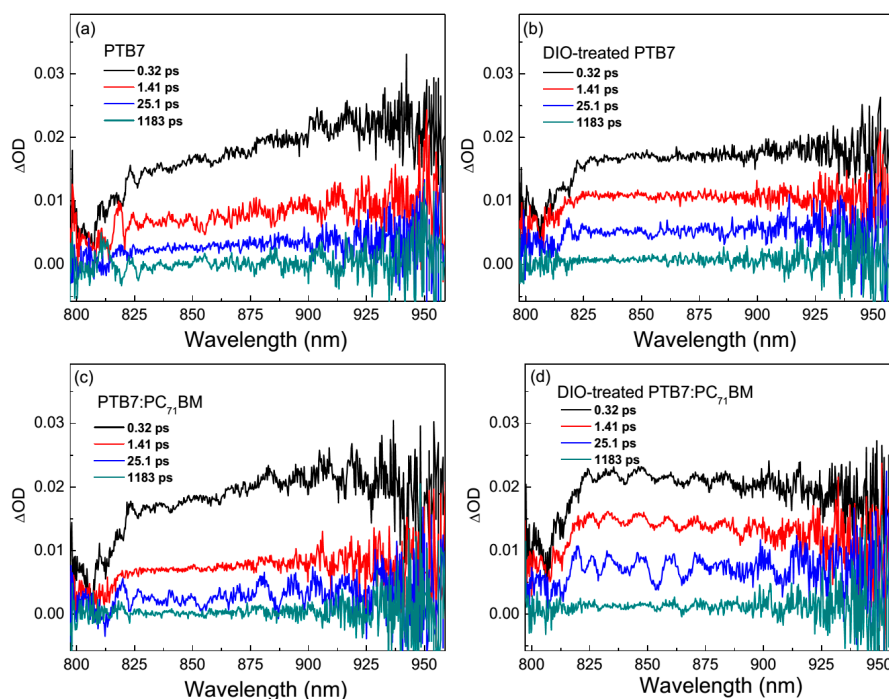

**Figure S3.** Transient absorption spectra of PTB7 (a), DIO-treated PTB7 (b), PTB7:PC<sub>71</sub>BM (c), and DIO-treated PTB7:PC<sub>71</sub>BM (d). All active layers were excited at 690 nm and the excitation photon fluence was  $3.7 \times 10^{13}$  photons·cm<sup>-2</sup>·pulse<sup>-1</sup> at room temperature.

#### S4. Estimation of hole and electron mobility in PTB7-based active layers by SCLC model.

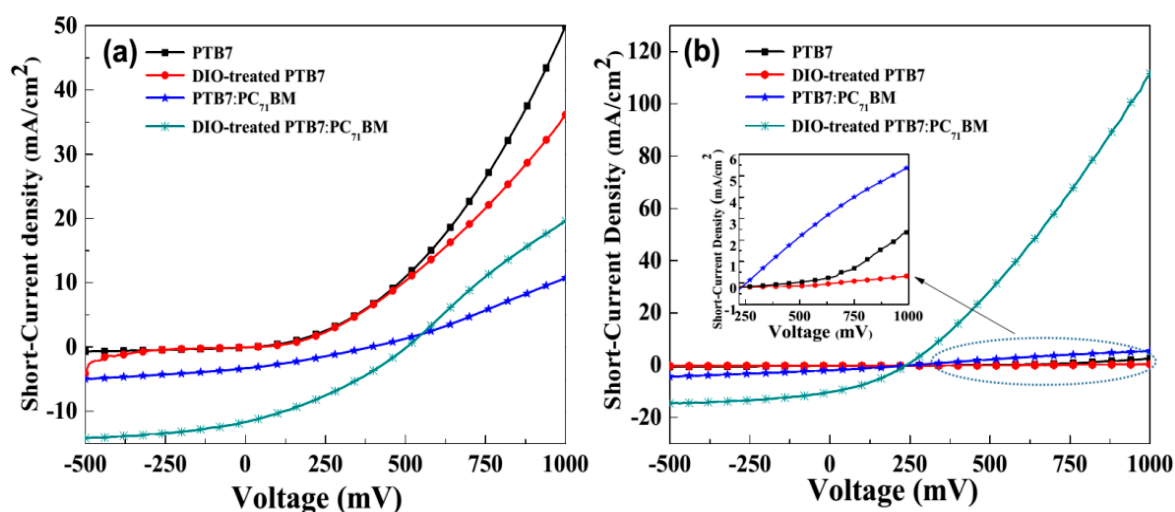

**Figure S4.** (a) J-V characteristics of hole-only devices based on varied active layers. (b) J-V characteristics of electron-only devices based on varied active layers. The inset: Enlarged J-V characteristics from 250 to 1000 nm. The hole mobility and electron mobility in the hole-only and the electron-only devices can be calculated by Mott-Gurney law as equation [S1]:  $J = 9/8\epsilon\epsilon_0 V^2/d^3$  where  $\epsilon$  is the relative permittivity of polymer assumed to be 3, and  $\epsilon_0$  is the vacuum dielectric constant of  $8.85 \times 10^{-12}$  F/m.  $V$  is the voltage, and  $d$  is the thickness of active layer.

#### REFERENCES

- S1. Wang, H.; Huang, J.; Xing, S.; Yu, J. Improved mobility and lifetime of carrier for highly efficient ternary polymer solar cells based on tips-pentacene in PTB7: PC<sub>71</sub>BM. *Organic Electronics* **2016**, 28, 11-19.

#### Corresponding Authors:

E-mail: hurong\_82@cqwu.edu.cn (R. Hu), lli@cqwu.edu.cn (L. Li).
